# Supplementary material for: A Highly Sensitive Diagnostic System for Detecting Dengue Viruses Using the Interaction between a Sulfated Sugar Chain and a Virion
Source: PubMed Central journal article supplement (PMC4444282; doi:10.1371/journal.pone.0123981), 2015-05-26
Supplement: pone.0123981.s002.pdf [file pone.0123981.s002.pdf]

**S1 Table. The list of sugar chains tested.**

| number | sugar chain                                                           | number | sugar chain                                            |
|--------|-----------------------------------------------------------------------|--------|--------------------------------------------------------|
| 1      | Glc $\alpha$ 1-4Glc                                                   | 25     | GalNAc $\alpha$ 1-6Glc                                 |
| 2      | Glc $\alpha$ 1-4Glc $\alpha$ 1-4Glc                                   | 26     | GalNAc $\beta$ 1-3Gal                                  |
| 3      | Glc $\alpha$ 1-6Glc                                                   | 27     | NeuAc $\alpha$ 2-3Gal $\beta$ 1-4Glc                   |
| 4      | Glc $\alpha$ 1-6Glc $\alpha$ 1-6Glc                                   | 28     | NeuAc $\alpha$ 2-3Gal $\beta$ 1-4GlcNAc                |
| 5      | Glc $\beta$ 1-3Glc $\beta$ 1-3Glc                                     | 29     | NeuAc $\alpha$ 2-3Gal $\beta$ 1-3GlcNAc $\beta$ 1-6Glc |
| 6      | Glc $\beta$ 1-4Glc                                                    | 30     | NeuAc $\alpha$ 2-3Gal $\beta$ 1-4GlcNAc $\beta$ 1-6Glc |
| 7      | Glc $\beta$ 1-6Glc                                                    | 31     | NeuAc $\alpha$ 2-6Gal $\beta$ 1-4Glc                   |
| 8      | Gal $\alpha$ 1-6Glc                                                   | 32     | NeuAc $\alpha$ 2-6Gal $\beta$ 1-3GlcNAc $\beta$ 1-6Glc |
| 9      | Gal $\alpha$ 1-4Gal $\beta$ 1-4Glc                                    | 33     | NeuAc $\alpha$ 2-6Gal $\beta$ 1-4GlcNAc $\beta$ 1-6Glc |
| 10     | Gal $\beta$ 1-3GalNAc $\alpha$ 1-6Glc                                 | 34     | NeuAc $\alpha$ 2-6GalNAc $\alpha$ 1-6Glc               |
| 11     | Gal $\beta$ 1-4GlcNAc $\beta$ 1-6Glc                                  | 35     | Chondroitin                                            |
| 12     | Gal $\beta$ 1-4Glc                                                    | 36     | Chondroitin sulfate A                                  |
| 13     | Gal $\beta$ 1-4(Fuc $\alpha$ 1-3)GlcNAc $\beta$ 1-3Gal $\beta$ 1-4Glc | 37     | Chondroitin sulfate B                                  |
| 14     | Man $\alpha$ 1-2Man                                                   | 38     | Chondroitin sulfate C                                  |
| 15     | Man $\alpha$ 1-3Man $\alpha$ 1-6Man                                   | 39     | Chondroitin sulfate D                                  |
| 16     | Man $\alpha$ 1-6Man                                                   | 40     | Chondroitin sulfate E                                  |
| 17     | Fuc $\alpha$ 1-2Gal $\beta$ 1-4Glc                                    | 41     | GlcNS6S $\alpha$ 1-4GlcA $\beta$ 1-6Glc                |
| 18     | Fuc $\alpha$ 1-6Glc                                                   | 42     | GlcNS6S $\alpha$ 1-4IdA2S $\alpha$ 1-6Glc              |
| 19     | Fuc $\beta$ 1-6Glc                                                    | 43     | GlcNS $\alpha$ 1-4GlcA $\beta$ 1-6Glc                  |
| 20     | Xyl $\beta$ 1-6Glc                                                    | 44     | GlcNS $\alpha$ 1-4IdA2S $\alpha$ 1-6Glc                |
| 21     | GlcNAc $\alpha$ 1-6Glc                                                | 45     | GlcA $\beta$ 1-3GalNAc4S6S $\beta$ 1-6Glc              |
| 22     | GlcNAc $\beta$ 1-4GlcNAc                                              | 46     | Heparin                                                |
| 23     | GlcNAc $\beta$ 1-3Gal $\beta$ 1-4GlcNAc $\beta$ 1-3Gal $\beta$ 1-4Glc | 47     | LMW Dextran sulfate                                    |
| 24     | GlcNAc $\beta$ 1-6Glc                                                 | 48     | CM-chitin                                              |

Note that ring structures of sugars at reducing-ends were lost during reductive amination to prepare sugar chain ligand-likers conjugate.
