# Supplementary material for: A Highly Sensitive Diagnostic System for Detecting Dengue Viruses Using the Interaction between a Sulfated Sugar Chain and a Virion
Source: PubMed Central journal article supplement (PMC4444282; doi:10.1371/journal.pone.0123981), 2015-05-26
Supplement: pone.0123981.s003.pdf [file pone.0123981.s003.pdf]

**S2 Table.** Detailed information on 87 samples analyzed using SGNPs (sulfated sugar chain-immobilized gold nanoparticles) and the Qiagen PCR assay. **Yellow cells indicate the corresponding Tm values for each of serotype. Red cells indicate the severe status of patients. Red ovals indicate positive results.**

| City           | Sample No | SGNP-PPT |          |       | SGNP-SUP |          |       | Qiagen   |          |    | Serotype | NS I      | IgG      | IgM      | Diagnosis | Gender | Age |
|----------------|-----------|----------|----------|-------|----------|----------|-------|----------|----------|----|----------|-----------|----------|----------|-----------|--------|-----|
|                |           | Ct Value | Tm value |       | Ct Value | Tm value |       | Ct Value | Tm value |    |          |           |          |          |           |        |     |
| Pangkal Pinang | 1         | 22.07    | 85       | ●     | 23.39    | 85       | ●     | 18.35    | 83.5     | ●  | III      | No data's | Fever 3d | M        | 4         |        |     |
|                | 2         | 11.73    | 75       | —     | 31.19    | 74.5     | —     | 30.49    | 78.5     | —  |          |           | Fever 1d | F        | 2         |        |     |
|                | 3         | 5.03     | 74.5     | —     | 33.57    | 75       | —     | 31.29    | 78       | —  |          |           | Fever 3d | M        | 11 MONTHS |        |     |
|                | 4         | 8.39     | 81.5     | ●     | 27.7     | 81.5     | ●     | 23.33    | 83.5     | ●  | II       |           | Fever 2d | F        | 16        |        |     |
|                | 5         | 26.57    | 75       | —     | 32.67    | 74.5     | —     | 31.49    | 77.5     | —  |          |           | Fever 4d | F        | 7 MONTHS  |        |     |
|                | 6         | 31.24    | 74.5     | —     | 32.05    | 74.5     | —     | 30.4     | 79       | —  |          |           | Fever 2d | M        | 8 MONTHS  |        |     |
|                | 7         | 33.67    | 75       | —     | 33.79    | 75       | —     | 30.55    | 78       | —  |          |           | Fever 3d | F        | 2         |        |     |
|                | 8         | 35.4     | 75.5     | —     | 35.81    | 75       | —     | 11.98    | 84.5     | ●  | I        |           | Fever 2d | M        | 4         |        |     |
|                | 9         | 29.1     | 75       | —     | 30.61    | 75       | —     | 31.22    | 77       | —  |          |           | Fever 3d | M        | 7         |        |     |
|                | 10        | 15.29    | 75       | —     | 33.96    | 75       | —     | 31.74    | 79.5     | —  |          |           | Fever 3d | F        | 4         |        |     |
|                | 11        | 34.73    | 74.5     | —     | 32.49    | 74       | —     | 31.06    | 78       | —  |          |           | Fever 3d | F        | 12        |        |     |
|                | 12        | 18.18    | 81.5     | ●     | 31.27    | 81.5     | ●     | 28.22    | 83.5     | ●  | II       |           | Fever 2d | F        | 8         |        |     |
|                | 13        | 25.40    | 81.5     | ●     | 31.38    | 81       | ●     | 27.16    | 84.5     | ●  | II       |           | Fever 2d | F        | 20        |        |     |
|                | 14        | 29.47    | 74.5     | —     | 34.03    | 74       | —     | 31.2     | 79       | —  |          |           | -        | M        | 32        |        |     |
|                | 15        | 25.77    | 84.5     | ●     | 27.1     | 84.5     | ●     | 31.4     | 76.5     | —  | I        |           | -        | F        | 10        |        |     |
|                | 16        | 35.26    | 75       | —     | 33.04    | 74.5     | —     | 31.6     | 79       | —  |          |           | -        | F        | 1         |        |     |
|                | 17        | 27.51    | 84       | ●     | 31.01    | 75       | —     | 25.9     | 77.5     | —  | I        |           | -        | M        | 33        |        |     |
|                | 18        | 27.26    | 74.5     | —     | 31.12    | 75       | —     | 28.47    | 79       | —  |          |           | -        | F        | 20        |        |     |
|                | 19        | 30.74    | 75       | —     | 32.05    | 74       | —     | 30.26    | 79.5     | —  |          |           | -        | M        | 12        |        |     |
|                | 20        | 26.63    | 84.5     | ●     | 28.22    | 85       | ●     | 28.34    | 84.5     | ●  | III      |           | -        | M        | 17        |        |     |
|                | 21        | 21.85    | 82       | ●     | 23.08    | 82.5     | ●     | 22.37    | 84.5     | ●  | II       |           | -        | M        | 19        |        |     |
|                | 22        | 32.6     | 84.5     | ●     | 31.85    | 74.5     | —     | 30.62    | 79       | —  | I        |           | Fever 3d | M        | 7         |        |     |
| Lampung        | 19        | 29.02    | 81.5     | ●     | 29.34    | 74.5     | —     | 22.47    | 81.5     | ●  | II       | +         | +        | —        | Fever 3d  | F      | 24  |
|                | 66        | 24.28    | 84.5     | ●     | 26.15    | 84       | ●     | 16.95    | 84.5     | ●  | I        | +         | —        | —        | Fever 2d  | M      | 17  |
|                | 18        | 23.24    | 84.5     | ●     | 24.69    | 84.5     | ●     | 15.68    | 85       | ●  | III      | +         | —        | —        | Fever 2d  | F      | 1   |
|                | 37        | 30.25    | 75       | —     | 29.78    | 75       | —     | 29.26    | 74.5     | —  |          | +         | —        | —        | Fever 4d  | F      | 39  |
|                | 13        | 30.19    | 74.5     | —     | 30.15    | 75       | —     | 27.17    | 84.5     | ●  | I/III    | +         | —        | +        | Fever 3d  | M      | 25  |
|                | 9         | 29.88    | 74.5     | —     | 30.34    | 74.5     | —     | 28.17    | 84       | ●  | I        | +         | —        | +        | Fever 3d  | F      | 1   |
|                | 71        | 19.13    | 84       | ●     | 18.82    | 84       | ●     | 9.27     | 84       | ●  | I        | +         | —        | —        | fever 5d  | M      | 25  |
| Jakarta        | 93        | 31.04    | 75       | —     | 29.95    | 75       | —     | 28.88    | 84       | ●  | I        | +         | —        | +        | fever 5d  | F      | 3   |
|                | 95        | 29.79    | 75       | —     | 29.05    | 74.5     | —     | 28.18    | 74.5     | —  |          | +         | +        | +        | fever 5d  | M      | 35  |
|                | 28        | 34.04    | 74.5     | —     | 30.55    | 74.5     | —     | 33.8     | 73.5     | —  |          | —         | —        | —        | fever 5d  | M      | 17  |
|                | 29        | 29.45    | 74.5     | —     | 30.59    | 75       | —     | 24.92    | 74.5     | —  |          | —         | —        | —        | -         | M      | 17  |
|                | 30        | 31.16    | 74       | —     | 30.72    | 74.5     | —     | 28.4     | 74       | —  |          | —         | —        | +        | DHF Gr 2  | F      | 15  |
|                | 31        | 29.43    | 74.5     | —     | 34.13    | 75       | —     | 0.62     | 74       | —  |          | -         | +        | -        | DSS       | F      | 12  |
|                | 32        | 30.99    | 74.5     | —     | 33.73    | 75       | —     | 28.9     | 84       | ●  | I        | +         | -        | -        | DHF Gr 1  | M      | 11  |
| Solo           | 33        | 30.67    | 74.5     | —     | 0.67     | 74.5     | —     | 29.71    | 74       | —  |          | -         | -        | +        | DHF Gr 3  | F      | 7   |
|                | 34        | 30.76    | 74.5     | —     | 34.06    | 74.5     | —     | 26.88    | 74       | —  |          | -         | -        | -        | Fever 4d  | M      | 12  |
|                | 1         | 34.47    | 74.5     | —     | 34.52    | 75       | —     | 29.23    | 74.5     | —  |          | -         | -        | -        | Fever     | F      | 2   |
|                | 2         | 30.62    | 82.5     | ●     | 34.65    | 76       | —     | 25.39    | 74.5     | —  | IV       | +         | -        | -        | Fever     | M      | 11  |
|                | 3         | 30.62    | 74.5     | —     | 32.63    | 75       | —     | 29.97    | 74.5     | —  |          | -         | -        | -        | Fever     | M      | 11  |
|                | 4         | 35.05    | 75       | —     | 33.89    | 74.5     | —     | 33.5     | 74.5     | —  |          | -         | -        | -        | Fever     | M      | 24  |
|                | 5         | 31.57    | 75       | —     | 33.14    | 75       | —     | 28.81    | 74.5     | —  |          | -         | -        | -        | Fever 4d  | F      | 8   |
|                | 6         | 32.87    | 74.5     | —     | 33.67    | 76.5     | —     | 28.57    | 74.5     | —  |          | -         | +        | +        | Fever     | M      | 23  |
|                | 7         | 30.98    | 75       | —     | 32.84    | 75       | —     | 26.98    | 74.5     | —  |          | -         | -        | -        | Fever     | F      | 23  |
|                | 8         | 23.29    | 84.5     | ●     | 31.1     | 85       | ●     | 24.67    | 84       | ●  | III      | +         | -        | -        | Fever     | F      | 28  |
|                | 9         | 34.81    | 75       | —     | 32.14    | 74.5     | —     | 22.94    | 74.5     | —  |          | +         | -        | -        | Fever     | M      | 7   |
|                | 10        | 31.48    | 83       | ●     | 34.82    | 75       | —     | 28.63    | 75       | —  | IV       | -         | -        | -        | Fever 1d  | M      | 45  |
|                | 11        | 33.58    | 82       | ●     | 27.98    | 82.5     | ●     | 19.94    | 82       | ●  | II       | +         | -        | -        | Fever 1d  | M      | 11  |
|                | 12        | 34.35    | 75       | —     | 33.48    | 75       | —     | 31.46    | 74.5     | —  |          | -         | -        | +        | Fever     | M      | 20  |
|                | 13        | 34.4     | 74.5     | —     | 33.65    | 74.5     | —     | 30.01    | 74.5     | —  |          | -         | -        | -        | Fever 2d  | M      | 13  |
|                | 14        | 29.59    | 74.5     | —     | 33.64    | 75       | —     | 30.34    | 74.5     | —  |          | -         | -        | -        | Fever 3d  | F      | 19  |
|                | 15        | 34.18    | 75       | —     | 33.31    | 75       | —     | 32.27    | 72.5     | —  |          | -         | -        | -        | Fever     | F      | 62  |
|                | 16        | 32.12    | 74.5     | —     | 34       | 75       | —     | 33.85    | 74.5     | —  |          | -         | -        | -        | Fever 2d  | M      | 14  |
|                | 17        | 31.69    | 75       | —     | 32.5     | 75       | —     | 25.6     | 74.5     | —  |          | +         | -        | -        | Fever 2d  | M      | 14  |
|                | 18        | 30.92    | 75.5     | —     | 32.85    | 74.5     | —     | 30.2     | 74.5     | —  |          | -         | -        | -        | Fever     | F      | 56  |
|                | 19        | 31.63    | 75       | —     | 34.28    | 75       | —     | 28.12    | 74.5     | —  |          | -         | -        | -        | Fever     | F      | 20  |
|                | 20        | 26.98    | 75       | —     | 32.97    | 74.5     | —     | 33.42    | 75.5     | —  |          | -         | +        | -        | DHF       | F      | 20  |
|                | 21        | 22.5     | 83       | ●     | 28.13    | 85.5     | ●     | 18.31    | 85       | ●  | IV/III   | +         | -        | -        | Fever 1d  | M      | 14  |
|                | 22        | 29.39    | 74.5     | —     | 33.13    | 74.5     | —     | 28.67    | 74.5     | —  |          | -         | -        | -        | Fever 2d  | F      | 31  |
|                | 23        | 27.05    | 75       | —     | 33.23    | 75       | —     | 29.63    | 74.5     | —  |          | -         | -        | +        | DHF       | F      | 9   |
|                | 24        | 25.44    | 74.5     | —     | 35.18    | 76       | —     | 28.86    | 74.5     | —  |          | -         | -        | -        | Fever     | M      | 67  |
|                | 25        | 30.96    | 75       | —     | 32.81    | 74.5     | —     | 28.51    | 74.5     | —  |          | -         | -        | -        | Fever     | F      | 21  |
|                | 26        | 30.22    | 75       | —     | 33.69    | 75       | —     | 28.84    | 74.5     | —  |          | -         | -        | -        | DHF Gr 1  | F      | 2   |
|                | 27        | 34.02    | 74.5     | —     | 32.07    | 75       | —     | 29.82    | 74.5     | —  |          | -         | +        | +        | DHF       | M      | 8   |
|                | 28        | 25.54    | 82       | ●     | 27.66    | 83       | ●     | 18.94    | 81.5     | ●  | II       | +         | -        | -        | Fever     | F      | 3   |
| 29             | 1.03      | 83       | ●        | 32.25 | 74.5     | —        | 29.43 | 74.5     | —        | IV | -        | -         | -        | Fever 2d | M         | 14     |     |
| 30             | 24.72     | 75       | —        | 32.92 | 75.5     | —        | 27.62 | 75       | —        |    | -        | +         | +        | Fever    | M         | 20     |     |

|    |       |      |   |       |      |   |       |      |   |    |   |   |   |          |   |    |
|----|-------|------|---|-------|------|---|-------|------|---|----|---|---|---|----------|---|----|
| 33 | 31.43 | 75.5 | — | 35.28 | 80.5 | — | 29.59 | 74.5 | — |    | - | + | + | DHF      | M | 14 |
| 34 | 31    | 74.5 | — | 35.16 | 74.5 | — | 28.42 | 74.5 | — |    | - | + | - | Fever    | M | 43 |
| 35 | 33.48 | 75   | — | 34.9  | 74.5 | — | 29.39 | 75   | — |    | - | + | - | -        | F | 39 |
| 36 | 32.11 | 75   | — | 34.93 | 75   | — | 27.15 | 74.5 | — |    | - | - | - | Fever    | M | 30 |
| 37 | 21.22 | 83   | ● | 30.63 | 75   | — | 30.65 | 74   | — | IV | - | - | - | Fever 3d | F | 63 |
| 38 | 30.7  | 75   | — | 30.13 | 74.5 | — | 30.26 | 74   | — |    | - | - | - | Fever    | M | 17 |
| 39 | 28.24 | 83   | ● | 31.63 | 74.5 | — | 29.17 | 74.5 | — | IV | - | - | - | Fever    | F | 16 |
| 40 | 30.8  | 75   | — | 27.76 | 75.5 | — | 28.94 | 74.5 | — |    | + | + | - | DHF      | F | 11 |
| 41 | 31.69 | 75   | — | 31.09 | 75.5 | — | 29.56 | 74.5 | — |    | - | + | - | Fever    | F | 15 |
| 42 | 26.98 | 84   | ● | 34.04 | 84   | ● | 27.55 | 83.5 | ● | I  | + | - | - | Fever    | F | 10 |
| 43 | 31.14 | 75   | — | 34.87 | 74.5 | — | 29.54 | 74   | — |    | - | - | - | Fever    | F | 10 |
| 44 | 30.79 | 75   | — | 32.15 | 75   | — | 29.88 | 74.5 | — |    | - | - | - | Fever    | F | 6  |
| 45 | 23.17 | 84   | ● | 28.17 | 84   | ● | 23.74 | 83.5 | ● | I  | + | - | - | Fever    | M | -  |
| 46 | 29.21 | 75   | — | 25.47 | 75   | — | 29.99 | 74   | — |    | - | - | - | Fever    | M | 6  |
| 47 | 30.98 | 75   | — | 25.71 | 74.5 | — | 28.64 | 80.5 | — |    | - | - | + | -        | F | -  |
| 48 | 30.6  | 75   | — | 25.63 | 74.5 | — | 29.74 | 75   | — |    | - | + | + | -        | M | 19 |
| 49 | 34.06 | 75   | — | 25.52 | 74.5 | — | 29.61 | 74.5 | — |    | - | + | + | -        | F | 33 |
