# Supplementary material for: A Highly Sensitive Diagnostic System for Detecting Dengue Viruses Using the Interaction between a Sulfated Sugar Chain and a Virion
Source: PubMed Central journal article supplement (PMC4444282; doi:10.1371/journal.pone.0123981), 2015-05-26
Supplement: pone.0123981.s004.pdf [file pone.0123981.s004.pdf]

**S3 Table. Primers used in this study.**

| <b>Serotype<br/>Primer</b> | <b>Sequence</b>                      | <b>Reference</b> |
|----------------------------|--------------------------------------|------------------|
| D1                         | 5'-TCAATATGCTGAAACGCGCGAGAAACCG-3'   | [9]              |
| D2                         | 5'-TTGCACCAACAGTCAATGTCCTTCAGGTTC-3' |                  |
| TS1                        | 5'-CGTCTCAGTGATCCGGGGG-3'            |                  |
| TS2                        | 5'-CGCCACAAGGGCCATGAACAG-3'          |                  |
| TS3                        | 5'-TAACATCATCATGAGACAGAGC-3'         |                  |
| TS4                        | 5'-CTCTGTTGTCTTAAACAAGAGA-3'         |                  |
| <b>General<br/>Primer</b>  | <b>Sequence</b>                      |                  |
| Forward                    | 5'-TTAGAGGAGACCCCTCCC-3'             | [12]             |
| Reverse                    | 5'-TCTCCTCTAACCTCTAGTCC-3'           |                  |
